# Supplementary material for: Specific biological responses of the synovial membrane to carbon nanotubes
Source: PubMed Central journal article supplement (PMC4585697; doi:10.1038/srep14314), 2015-09-21
Supplement: srep14314-s1.pdf [file srep14314-s1.pdf]

## **Supplementary information**

### **Specific biological responses of the synovial membrane to carbon nanotubes**

Hiroki Nomura<sup>1</sup>, Seiji Takanashi<sup>1</sup>, Manabu Tanaka<sup>1</sup>, Hisao Haniu<sup>2</sup>, Kaoru Aoki<sup>1</sup>, Masanori Okamoto<sup>1</sup>, Shinsuke Kobayashi<sup>1</sup>, Takashi Takizawa<sup>1</sup>, Yuki Usui<sup>3</sup>, Ayumu Oishi<sup>2</sup>, Hiroyuki Kato<sup>1</sup> and, Naoto Saito<sup>2\*</sup>

<sup>1</sup>Department of Orthopaedic Surgery, Shinshu University School of Medicine, Asahi 3-1-1, Matsumoto 390-8621, Japan

<sup>2</sup>Institute for Biomedical Sciences, Interdisciplinary Cluster for Cutting Edge Research, Shinshu University, Asahi 3-1-1, Matsumoto 390-8621, Japan

<sup>3</sup>Aizawa Hospital Sports Medicine Center, Honjou 2-5-1, Matsumoto 390-8510, Japan

\*Corresponding author:

Naoto Saito, Professor & Director, Institute for Biomedical Sciences, Interdisciplinary Cluster for Cutting Edge Research, Shinshu University, Asahi 3-1-1, Matsumoto, 390-8621 Japan; TEL, FAX: +81 263 37 2409, e-mail: [saitoko@shinshu-u.ac.jp](mailto:saitoko@shinshu-u.ac.jp)

## **Supplementary Materials and Methods**

Average diameters of aggregated secondary particles of MWCNT7 (Hodogaya Chemical Co., Ltd., Tokyo, Japan) and Carbon Black (CB; Mitsubishi Chemical Corporation, Tokyo, Japan) were measured. Dispersion liquid was prepared by diluting polysorbate 80 (NOF Corporation, Tokyo, Japan) in phosphate-buffered saline (PBS; Gibco, NY, USA) to 0.1%. MWCNTs and CB were diluted to 0.02 mg/mL, and the diameters were measured three times each using a Zetasizer Nano Range instrument (Malvern Instruments, Malvern, UK).

## **Supplementary Results**

The average diameters of secondary particles for MWCNTs and CB were 1756 and 285 nm (Supplementary Figure).

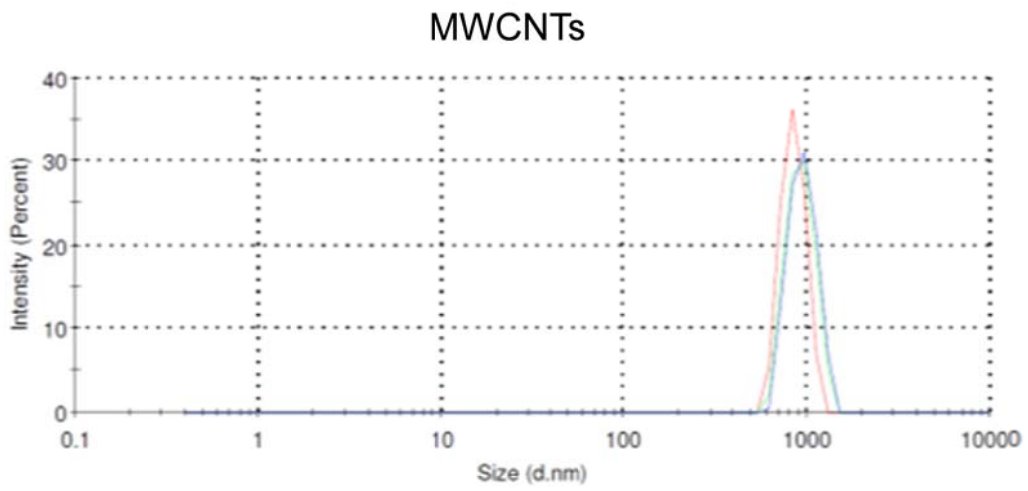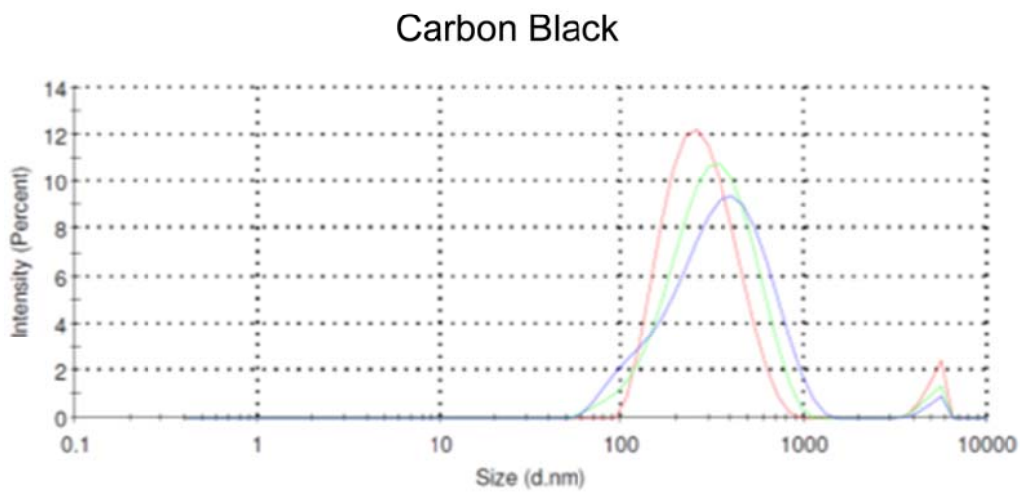

**Supplementary Figure.** Average diameter of secondary particles for MWCNTs and Carbon Black (0.02 mg/mL).
